# Supplementary material
Source: publisher site journal article supplement (https://www.dovepress.com/article/389329)
Supplement: Supplementary file 1 [file get_supplementary_file.php]

**Supplementary Materials**

**Table S1:** Comparative release of verapamil HCl loaded composite NFs (N6) and (Z5) after 2 and 24 hr.

|  | % Drug release from NF formulations | | p |
| --- | --- | --- | --- |
| **PVA-Z (Z5)** | **PVA-SA (N6)** |
| **2 hours** |  |  | 0.027* |
| Mean ± SD | 19.0 ± 1.0 | 29.7 ± 1.15 |
| **24 hours** |  |  | 0.026* |
| Mean ± SD | 68.0 ± 1.0 | 93.7 ± 2.08 |

(*) Significant

**Figure S1:** Comparative verapamil HCl release from loaded composite NFs (N6) and (Z5) after 2 hr and 24 hr.

|  | Grp 0  Control | Grp 1  Verapamil HCl conventional gel | Grp 2  Placebo PVA-SA NFs (N2) | Grp 3 Placebo PVA-Z NFs (Z4) | Grp 4  Verapamil loaded PVA-SA NFs (N6) | Grp 5  Verapamil loaded PVA-Z NFs (Z5) | Test of significance  (p) |
| --- | --- | --- | --- | --- | --- | --- | --- |
| % Wound healing | | | | | | | |
| Day 7 |  |  |  |  |  |  |  |
| Mean ± SD | 23±6.08 | 28±3 | 33±3 | 27±8.1 | 54±4 | 33±4.3 | (F=13.8, P<.001*) |
| Sig. between groups | Sig between Grp 4 Vs {control, Grp (1,2,3,5)} | | | | | |  |
| Day 14 |  |  |  |  |  |  |  |
| Mean ± SD | 69±5.3 | 73±3 | 90±5 | 67±2 | 100±2 | 100±5 | (F=13.8, P<.001*) |
| Sig. between groups | Sig between {Grp 0 Vs Gp(2,4,5) }**&** {Gp1 vs Gr(2,4,5)} **&**{ Gp2 vs Gr (0,1,3)}**&** {Grp3 Vs Grp(2,4,5)}**&**{Grp 4 vs Grp (0,1,3)}**&**{Grp 5 vs Grp(0,1,3)} | | | | | |  |

**Table S2**: Comparative % wound healing results for different treatment groups after 7 and 14 days.

(*) Significant

F; One Way ANOVA based on boot strapping technique


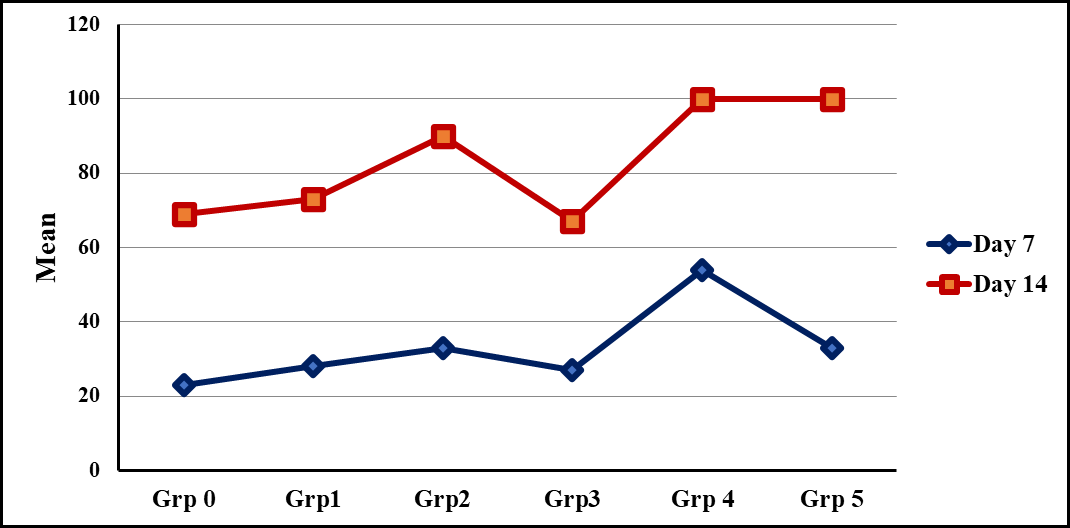


**Figure S2:** Comparison between % wound healing of different treatment groups after 7 and 14 days.
